# Supplementary material
Source: Springer Nature journal article supplement (https://www.springermedizin.de/resource/supplementary/13075_2013_4086_MOESM7_ESM.pdf/9695992)

**Adiponectin**  
**AUC=0.57**

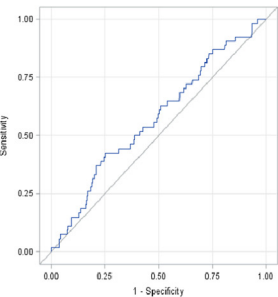

**Leptin**  
**AUC=0.59**

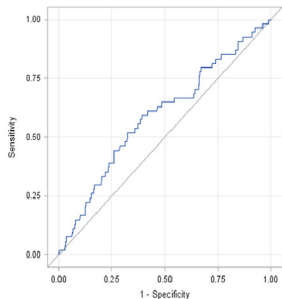

**Visfatin**  
**AUC=0.52**

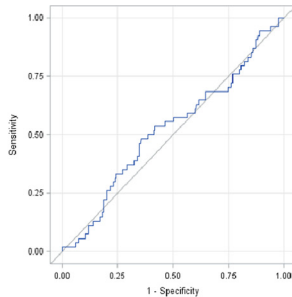

**DAS28**  
**AUC=0.50**

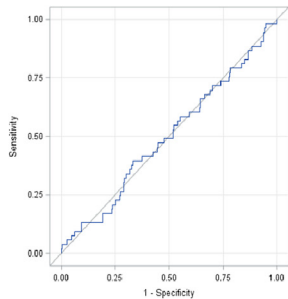

**Swollen joints**  
**AUC=0.53**

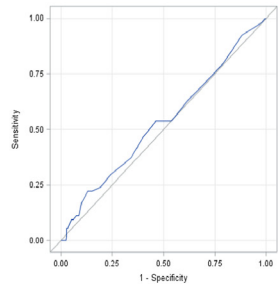

**CRP**  
**AUC=0.53**

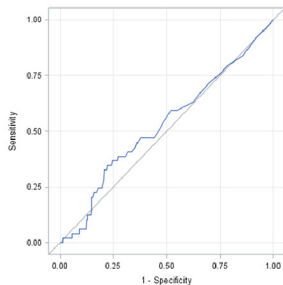

**RF level**  
**AUC=0.67**

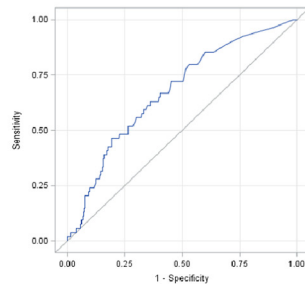

**Anti-CCP level**  
**AUC=0.69**

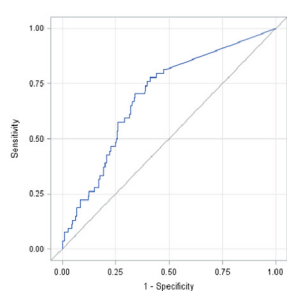

Supplement: MOESM7 [file 9695992]
